# Supplementary material for: Succinate-GPR91 signaling promotes cardiomyocyte metabolic reprogramming and NAD⁺ production to alleviate HFpEF
Source: Research Square preprint supplement (doi:10.21203/rs.3.rs-7556256/v1), 2025-09-17
Supplement: Supplementary file 1 [file 24aafd152e1b5d57ced49e98.docx]

**Additional file 1**

**
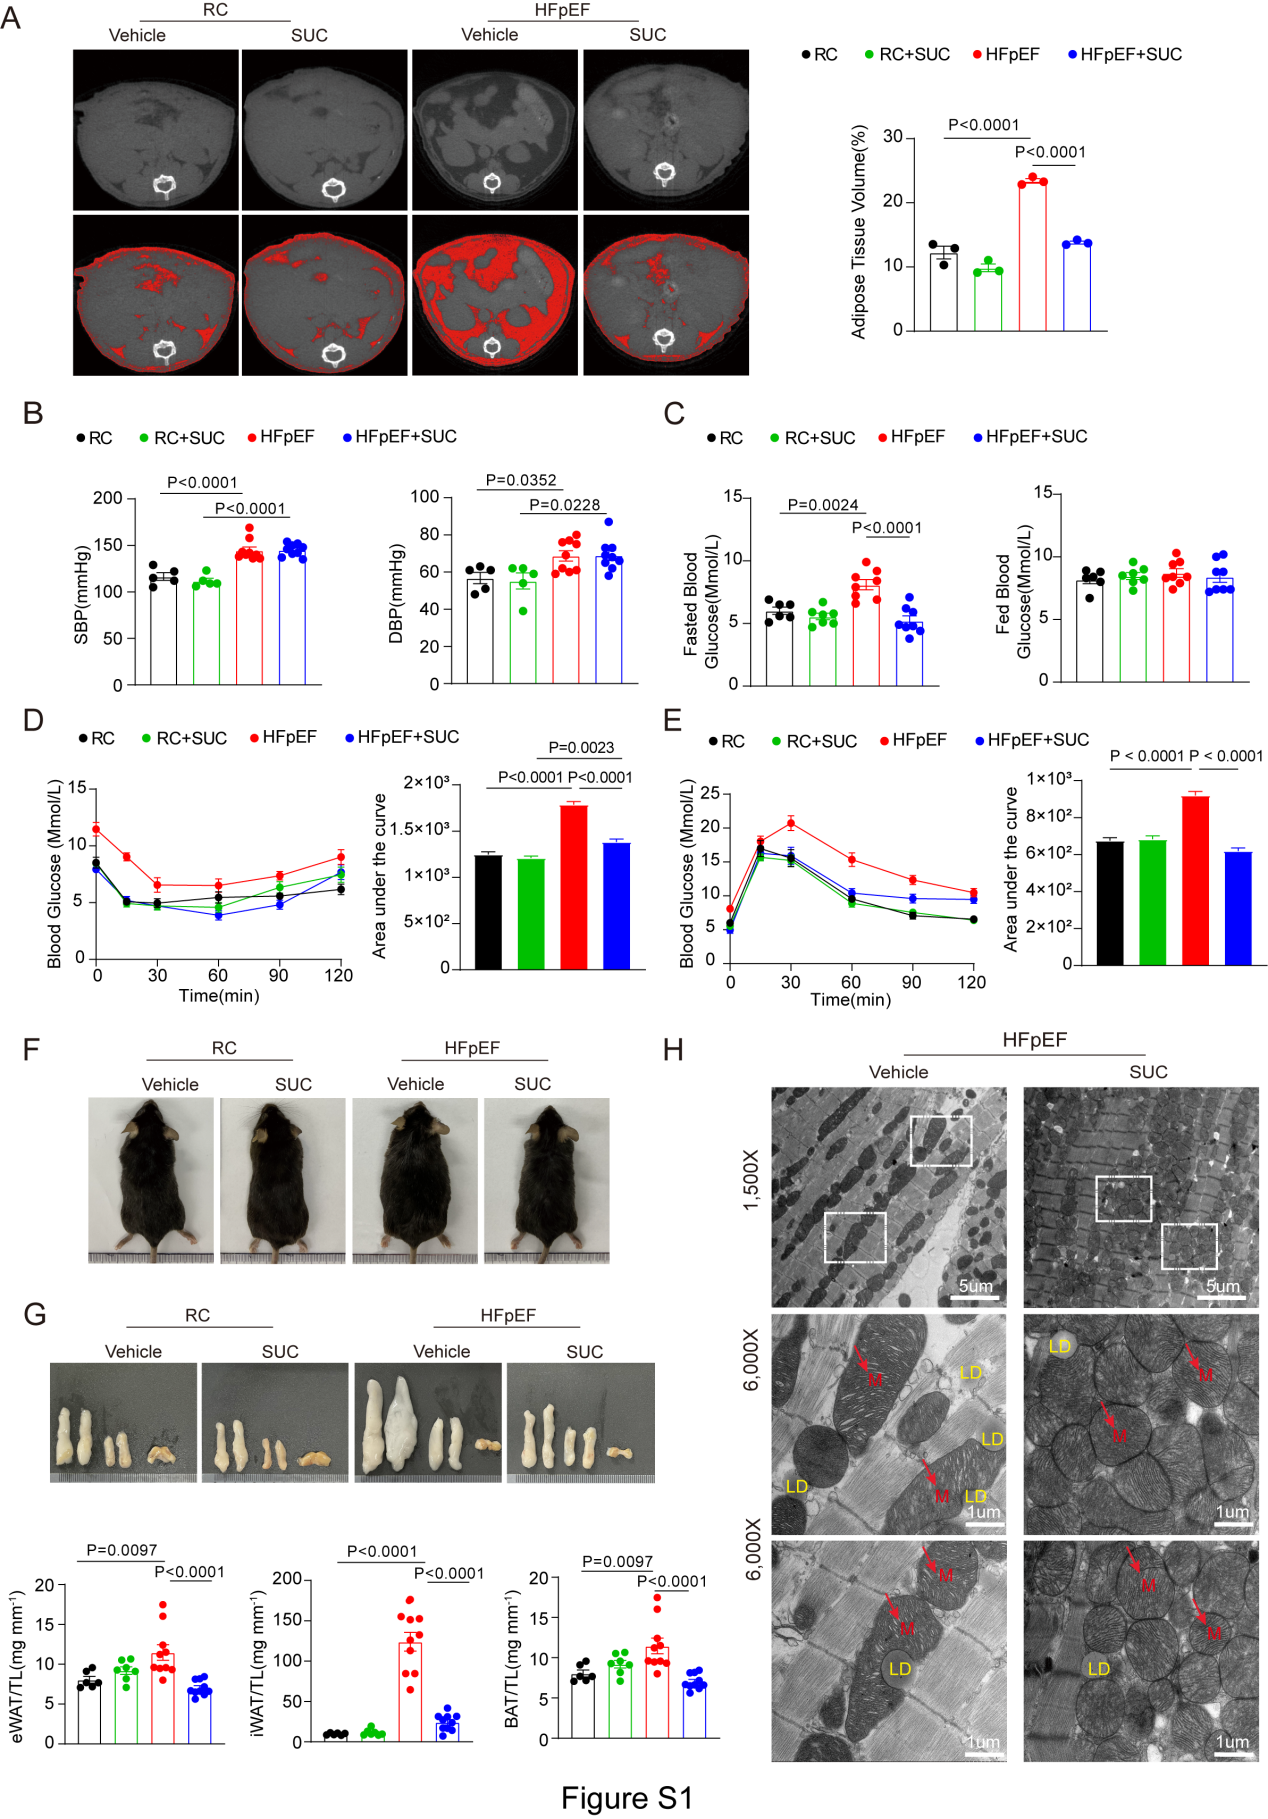
**

**Supplemental Figure 1: Succinate Alleviates Lipid Accumulation and Metabolic Dysregulation in HFpEF Mice.**

**(A)**, Representative CT images and quantification of total fat content.n=3 in RC and RC+SUC; n=6 in HFpEF and HFpEF+SUC. **(B)**, Systolic and diastolic blood pressure measurements.n=5 in RC and RC+SUC; n=9 in HFpEF and HFpEF+SUC. **(C)**,Fasting and random blood glucose levels.n=6-7 in RC and RC+SUC; n=8 in HFpEF and HFpEF+SUC. **(D)**, Glucose tolerance test and **(E)**, insulin tolerance test,as well as the area under curve (AUC). n=6-7 in RC and RC+SUC; n=8 in HFpEF and HFpEF+SUC. **(F)**, Representative gross morphology of mice. **(G),** Representative images and quantification of adipose tissue. Epididymal white adipose tissue (eWAT), inguinal white adipose tissue (iWAT), brown adipose tissue(BAT). n=6-7 in RC and RC+SUC; n=10 in HFpEF and HFpEF+SUC. **(H)**, Representative electron microscopy image shows the lipid droplets (yellow) in cardiomyocytes and Mitochondria(red arrow). All data are presented as the mean±SEM. P<0.05 are statistically significant and precise values are specified in corresponding figures. Data were analyzed by two-way ANOVA **(A-G)**.


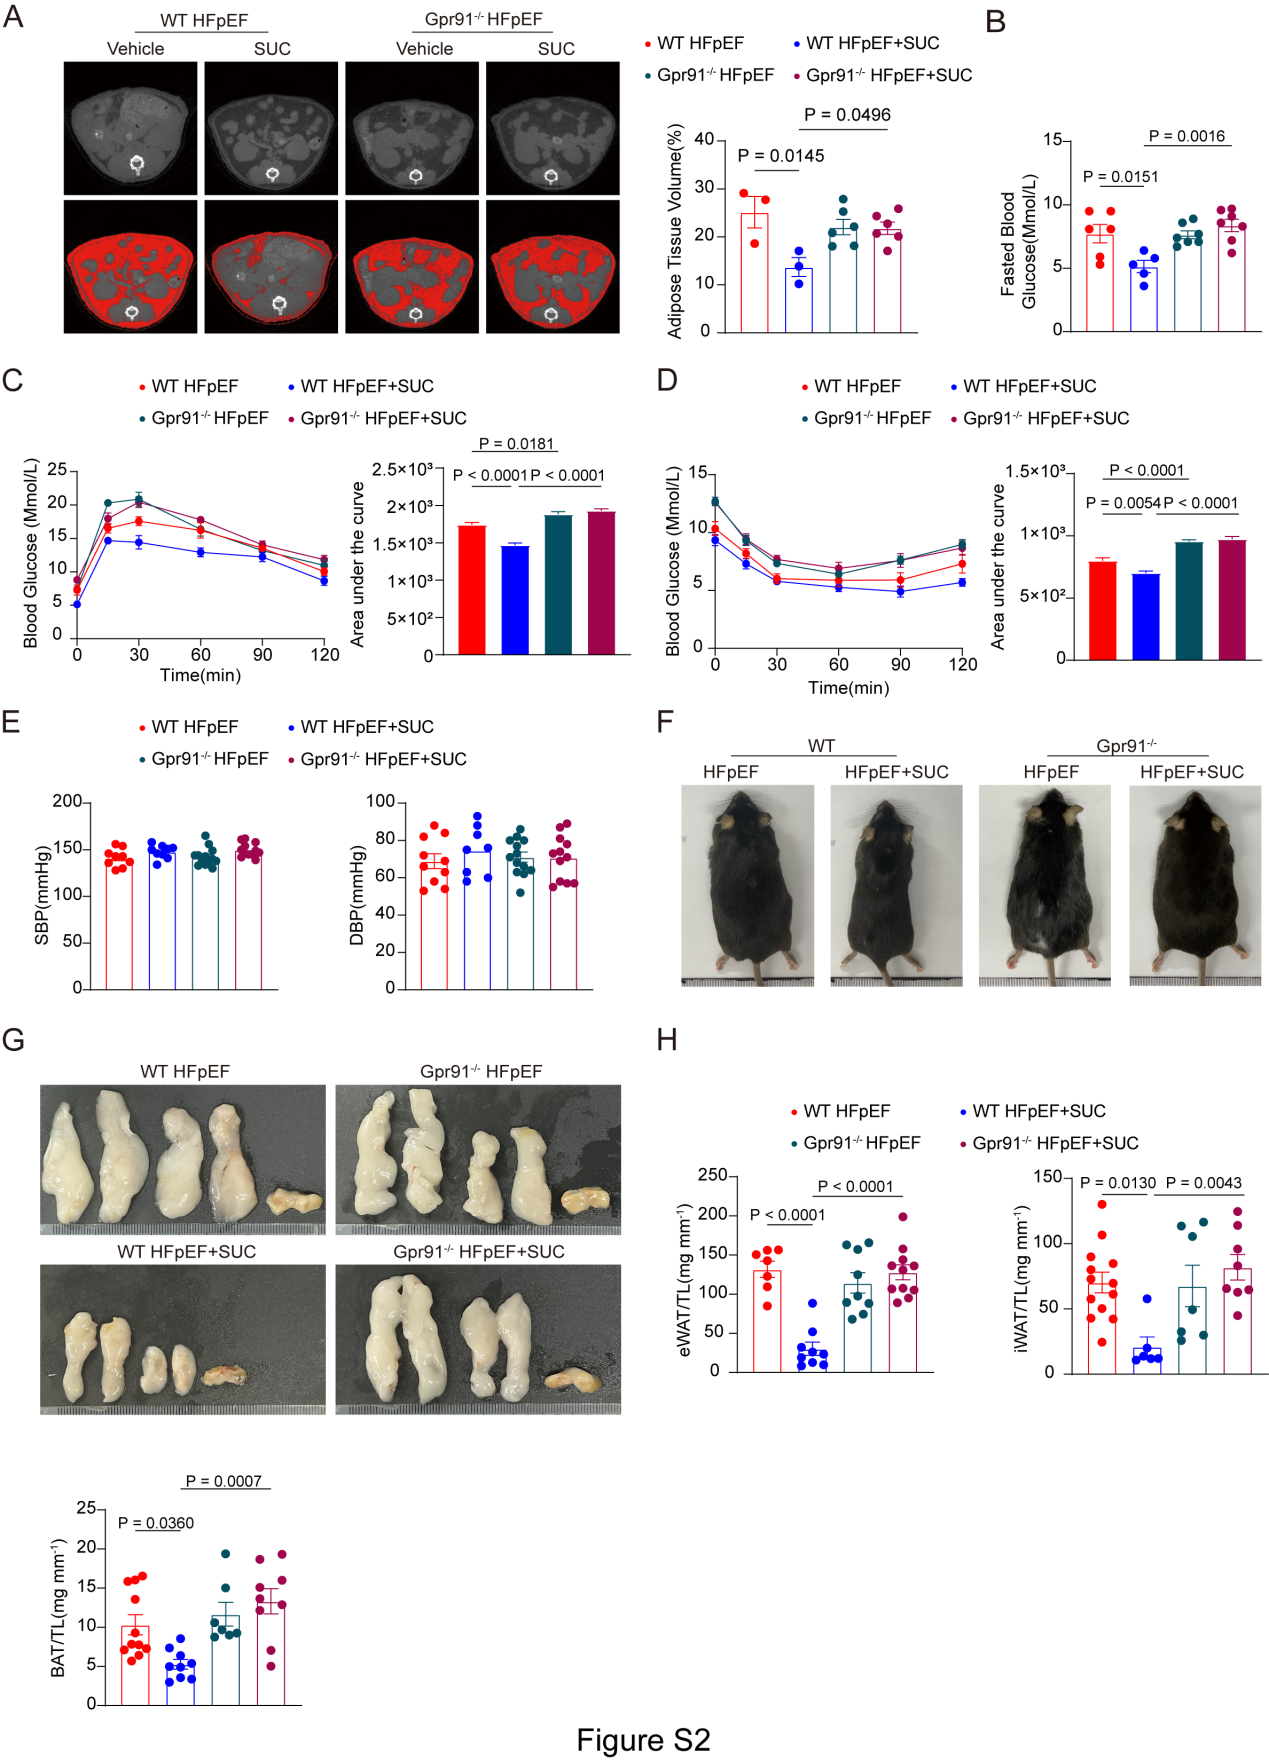


**Supplemental Figure 2:** GPR91 Deletion Aggravates Lipid Accumulation and Metabolic Dysregulation in HFpEF Mice

1. , Representative CT images and quantification of total fat content.n=3 in WT; n=6 in GPR91KO. **(B)**, Fasting blood glucose levels.n=5-7 in each group. **(C)**, Glucose tolerance test and **(D)**, insulin tolerance test,as well as the area under curve (AUC). n=8-9 in each group. **(E)**, Systolic and diastolic blood pressure measurements.n=9-13 in each group. **(F)**, Representative gross morphology of mice. **(G and H),** Representative images and quantification of adipose tissue. Epididymal white adipose tissue (eWAT), inguinal white adipose tissue (iWAT), brown adipose tissue(BAT). n=7-14 in each group. All data are presented as the mean±SEM. P<0.05 are statistically significant and precise values are specified in corresponding figures. Data were analyzed by two-way ANOVA **(A-H)**.


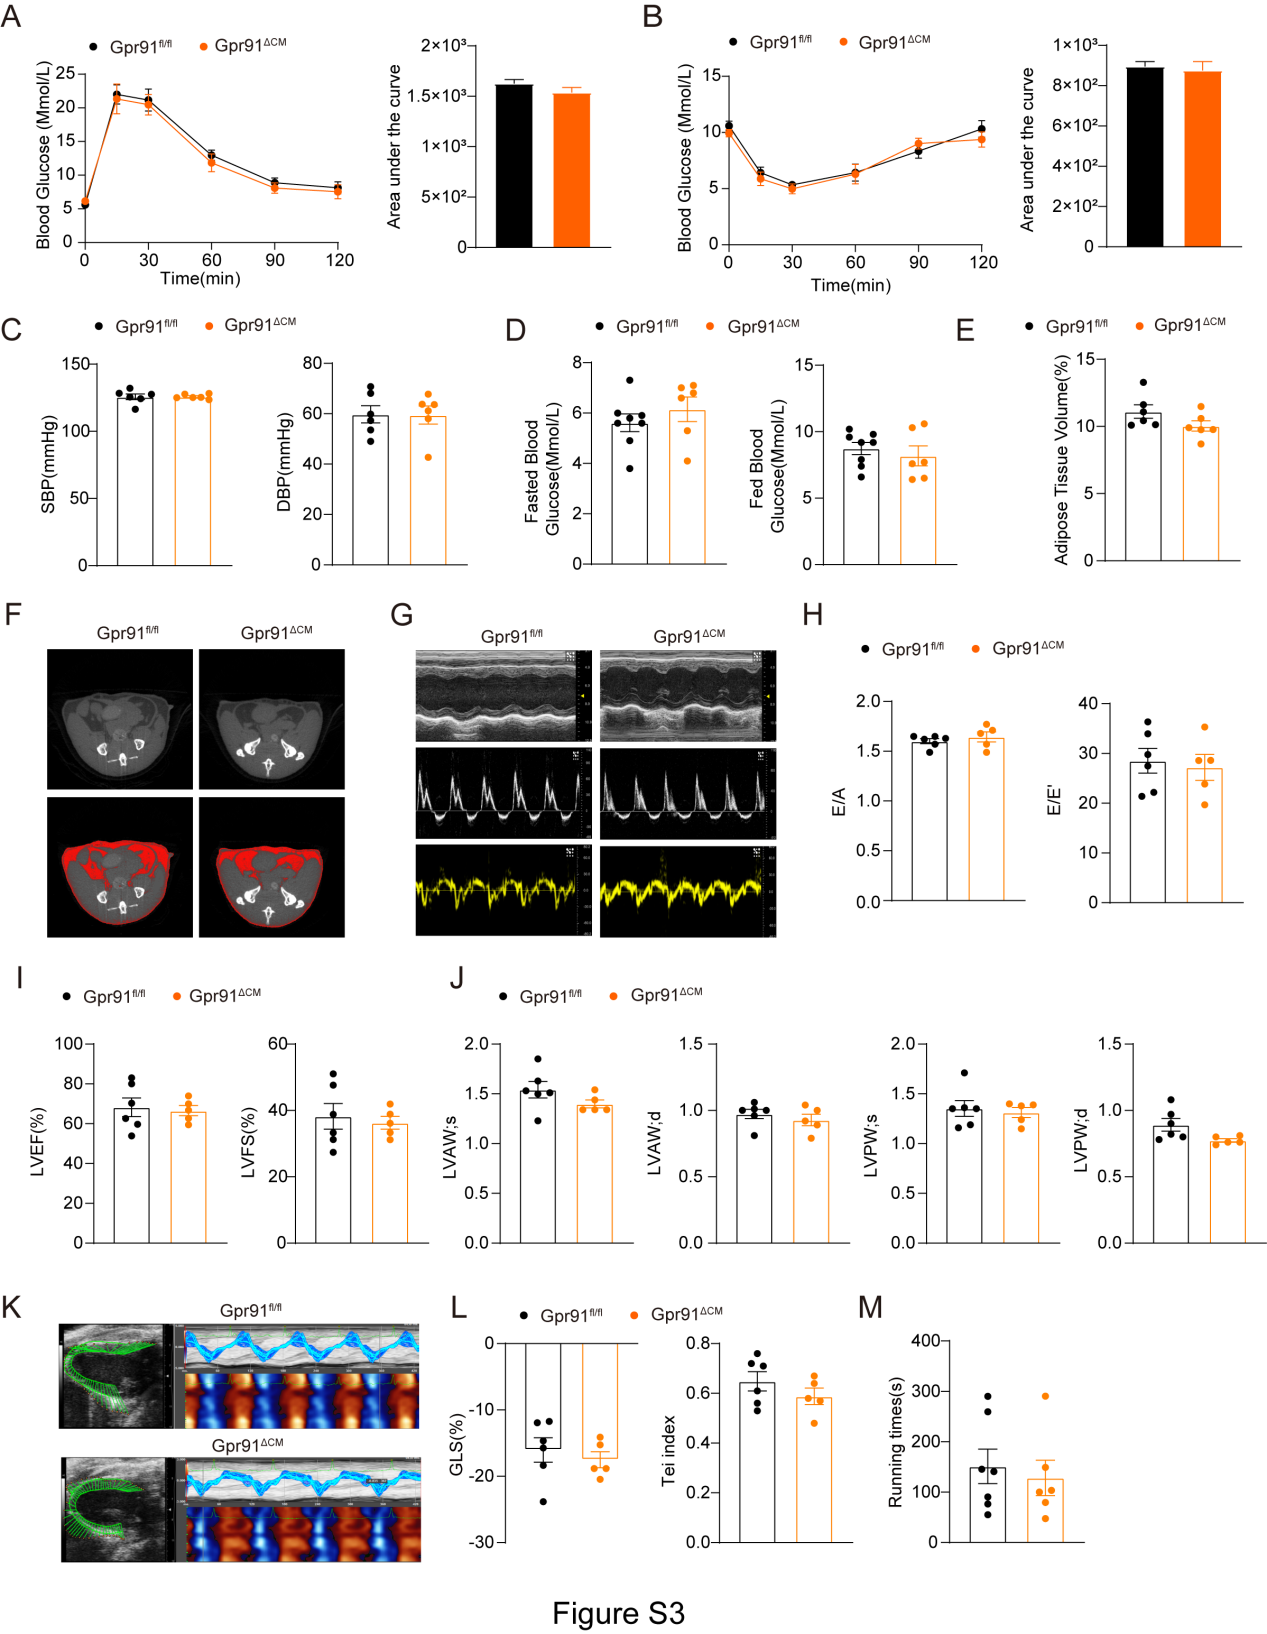


**Supplemental Figure 3:** Cardiac-specific deletion of GPR91 does not significantly affect cardiac function under regular chow conditions.

**(A)**, Glucose tolerance test and **(B)**, insulin tolerance test, as well as the area under curve (AUC). n=6 or 8 in each group. **(C)**, Systolic and diastolic blood pressure measurements.n=6 in each group. **(D)**, Fasting blood glucose levels.n=6-8 in each group. **(E and F)** Representative CT images and quantification of total fat content.n=6 in each group. **(G)**, Representative echocardiographic images. **(H)**, E/A and E/E′ ratio. **(I)**, Representative myocardial strain analysis using VevoStrain. **(J)**, Tei index and Left ventricular global longitudinal strain (GLS). **(K)**, Left ventricular ejection fraction (LVEF, %). n = 5-6 in each group. **(L)**, Rotarod-determined running time during the exercise exhaustion test. n = 6-7 in each group. All data are presented as the mean±SEM. P<0.05 are statistically significant and precise values are specified in corresponding figures. Data were analyzed by Student t test (A-L).


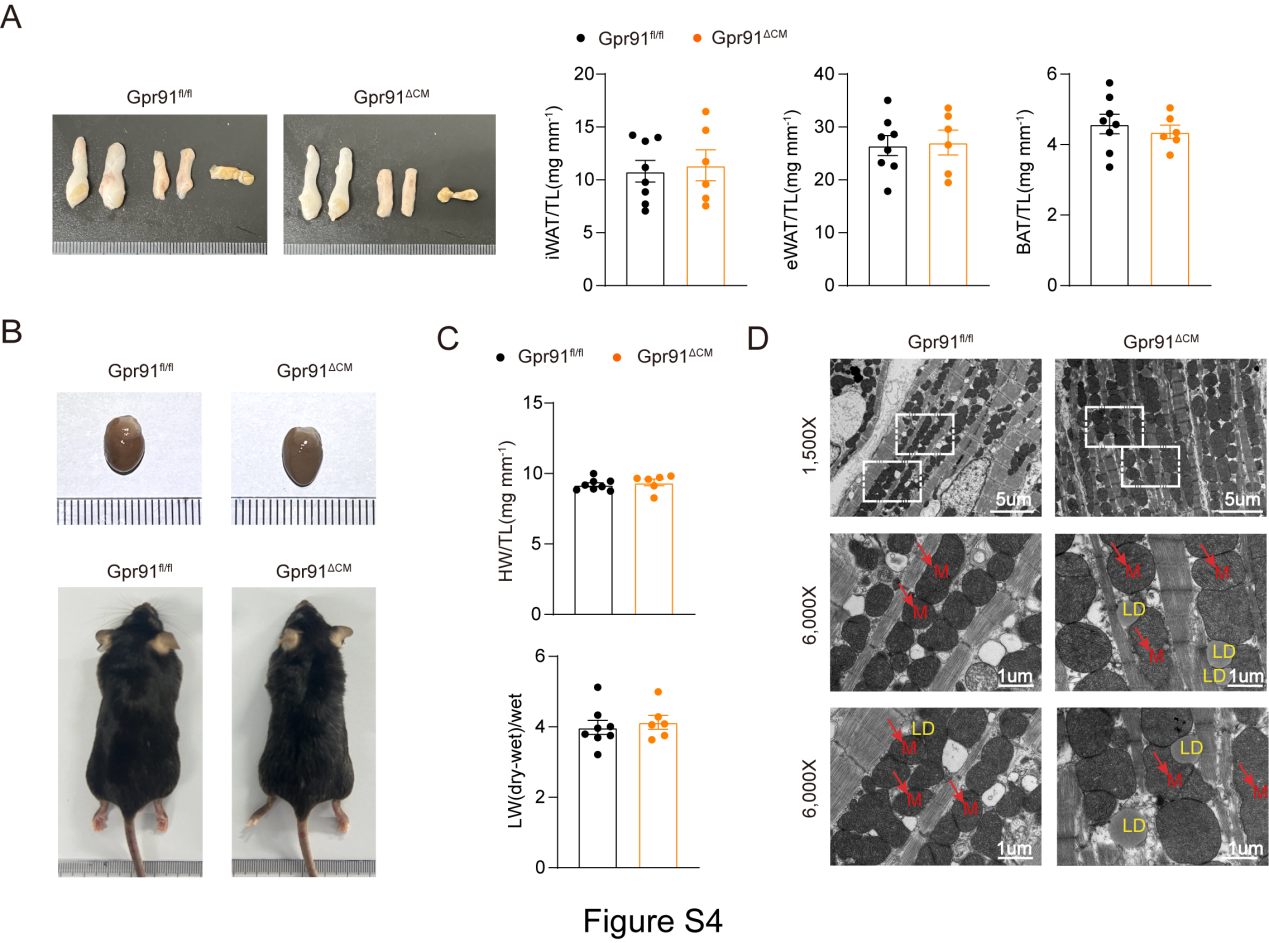


**Supplemental Figure 4:** Cardiomyocyte-specific deletion of GPR91 under regular chow conditions leads to increased lipid droplet accumulation in cardiac tissue.

1. , Representative images and quantification of adipose tissue. Epididymal white adipose tissue (eWAT), inguinal white adipose tissue (iWAT), brown adipose tissue(BAT). **(B)**, Representative gross morphology of mice and heart tissues. **(C)**, Heart weight/tibia length ratio (HW/TL) and lung weight. n=6-8 in each group. **(D)**, Representative electron microscopy image shows the lipid droplets (yellow) in cardiomyocytes and Mitochondria(red arrow). All data are presented as the mean±SEM. P<0.05 are statistically significant and precise values are specified in corresponding figures. Data were analyzed by Student t test (A-C).


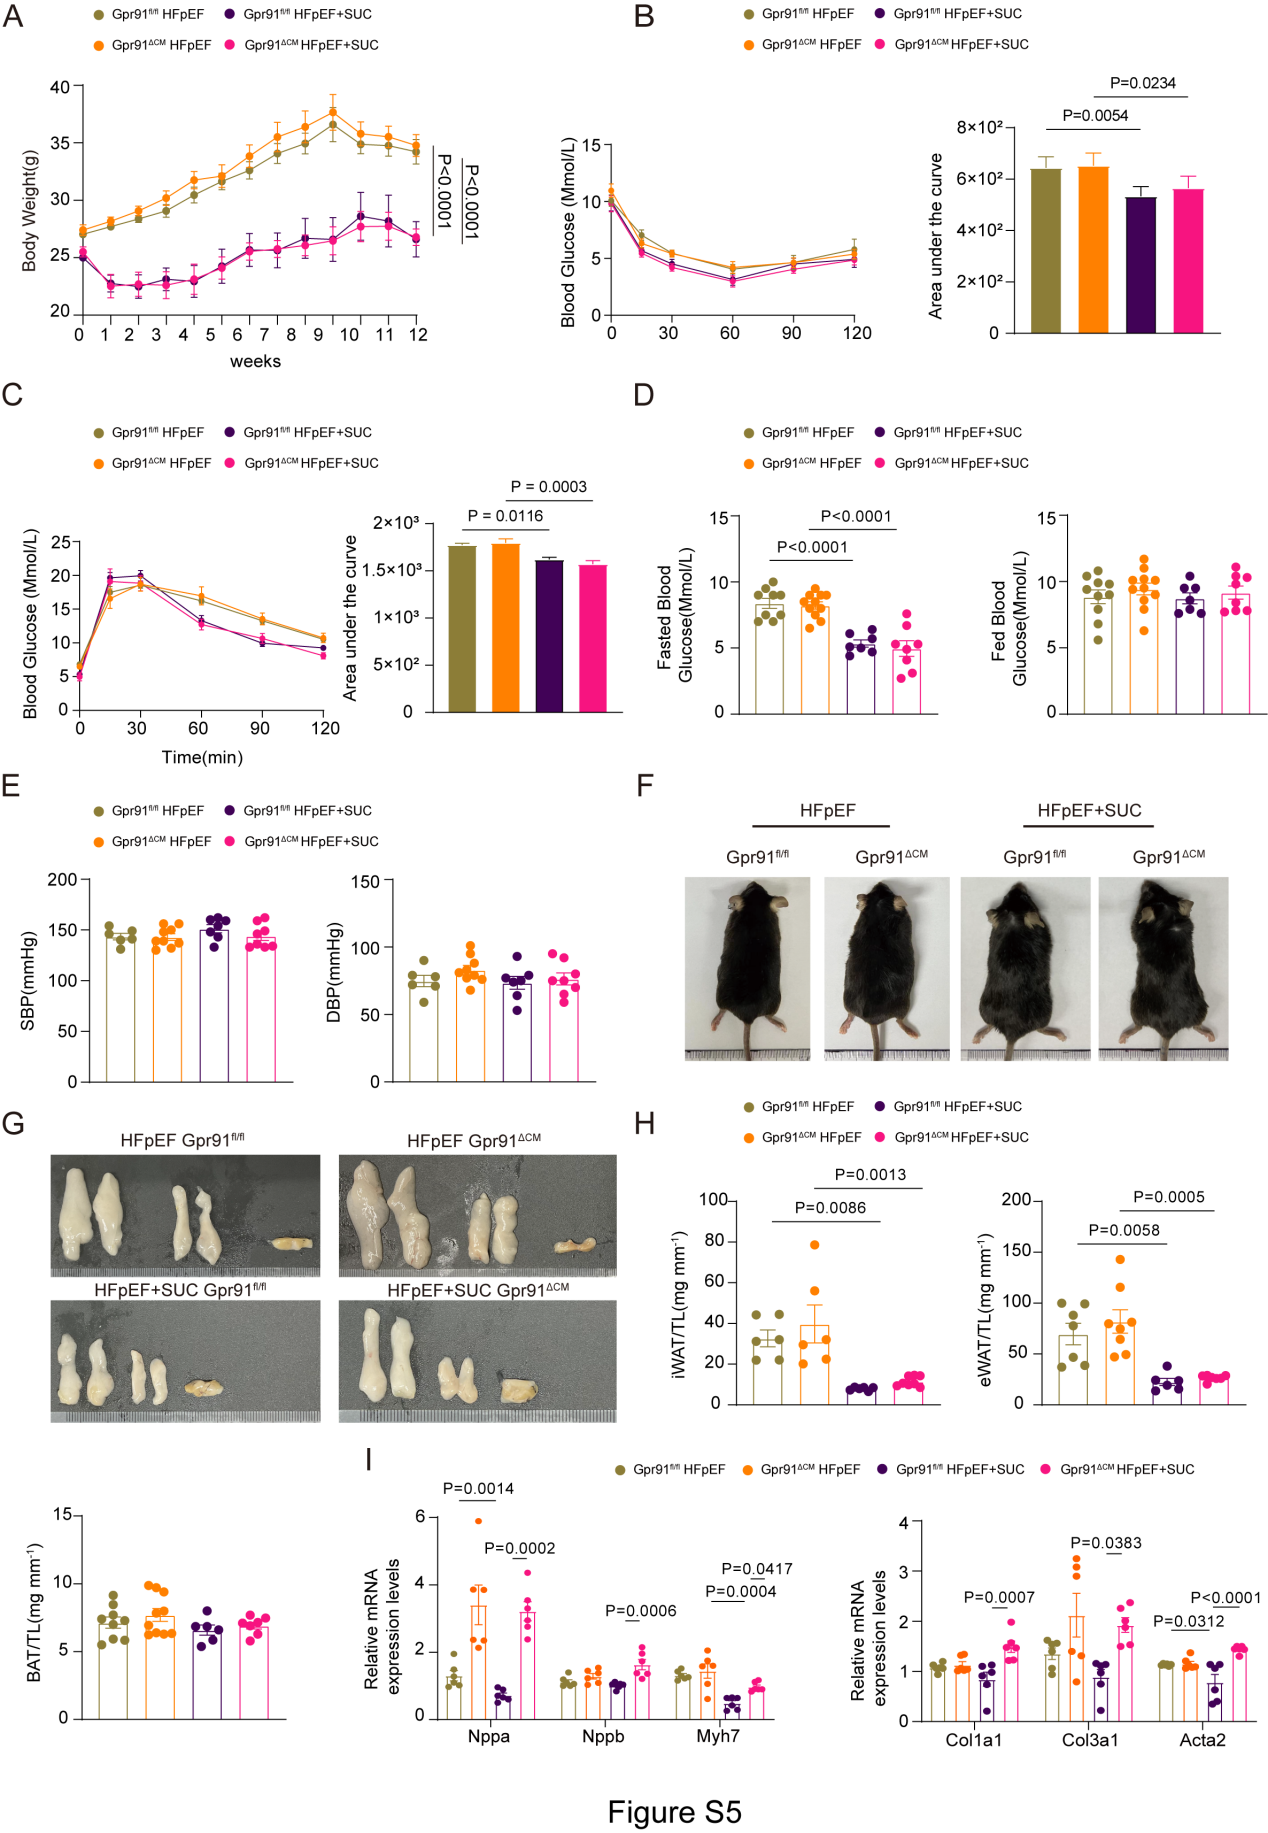


**Supplemental Figure 5: Succinate Provides Partial Metabolic Benefits but Does Not Prevent Cardiac Remodeling in GPR91-Deficient HFpEF Mice.**

1. , Body Weight. n=7-10 in each group. **(B),** Glucose tolerance test and **(C)**, insulin tolerance test, as well as the area under curve (AUC). n=5-8 in each group. **(D)**, Fasting and random blood glucose levels. n=7-11 in each group. **(E),** Systolic and diastolic blood pressure measurements.n=6-9 in each group. **(F)**, Representative gross morphology of mice. **(G and H)**, Representative images and quantification of adipose tissue. Epididymal white adipose tissue (eWAT), inguinal white adipose tissue (iWAT), brown adipose tissue(BAT). n=6-10 in each group. **(I)**, Relative mRNA expression levels of Nppa, Nppb, and Myh7, Col1a1, Col3a1, and Acta2 in cardiac tissue from each group. n = 6 per group. Each data point represents one mouse. All data are presented as the mean±SEM. P<0.05 are statistically significant and precise values are specified in corresponding figures. Data were analyzed by one-way ANOVA(D-I) and two-way ANOVA (A-C).


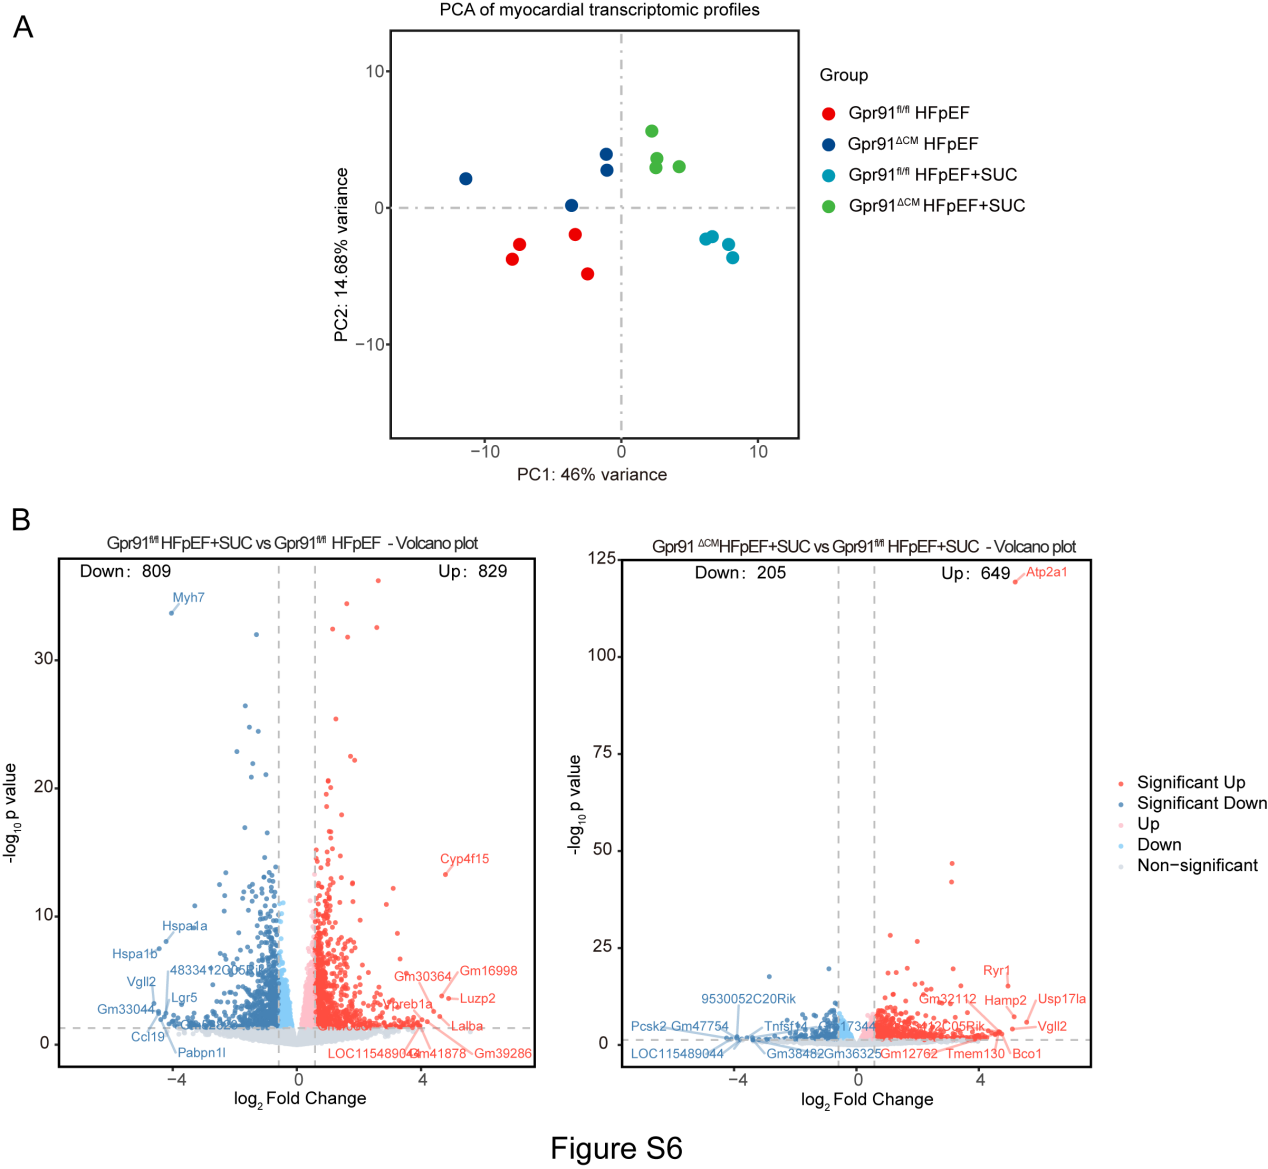


**Supplemental Figure 6: PCA plot and volcano plots of differentially expressed genes among Gpr91ΔCM and Gpr91fl/fl mice with or without succinate treatment.**

**(A),** PCA plot showing principal component analysis of transcriptomic profiles from four groups. **(B)**,Volcano plots of Gpr91fl/fl HFpEF+SUCVS Gpr91fl/fl HFpEF and Gpr91fl/fl HFpEF+SUC vs Gpr91ΔCM HFpEF+SUC.


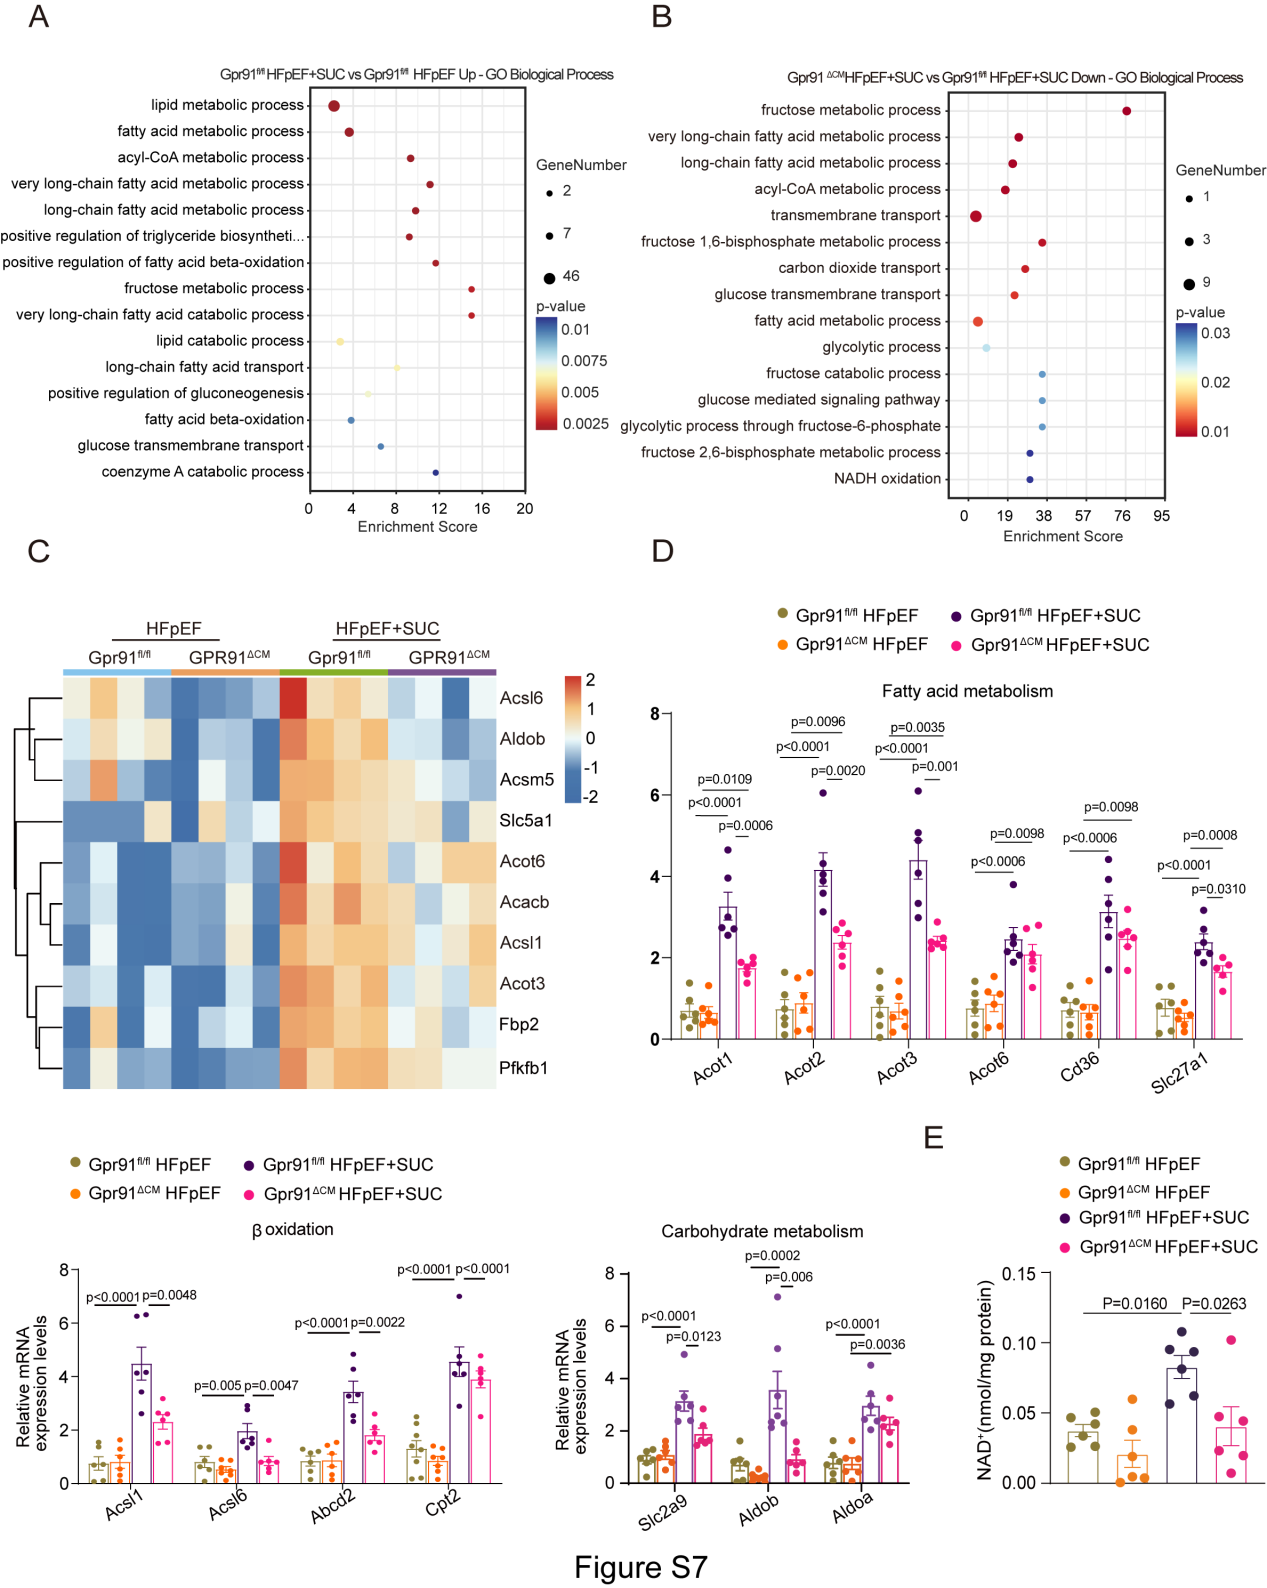


**Supplemental Figure 7: Succinate supplementation improves glucose and lipid metabolism and enhances NAD+ biosynthesis in a GPR91-dependent manner.**

**(A)**, Enrichment of gene ontology (GO)–biological processes based on genes upregulated in Gpr91fl/fl HFpEF+SUC VS Gpr91fl/flHFpEF using unadjusted differential gene expression Analysis. **(B)**, Enrichment of gene ontology (GO)–biological processes based on genes downregulated in Gpr91ΔCM HFpEF+SUC VS Gpr91fl/fl HFpEF+SUC using unadjusted differential gene expression Analysis. **(C)**, Heatmap showing the relative expression of significantly altered genes related to glucose and lipid metabolism in the heart tissue. n = 4 per group. **(D)**, qPCR analysis of relative expression levels of genes involved in glucose and lipid metabolism. n = 6 per group. Data are expressed as mean ± SEM. P < 0.05 was considered statistically significant, and exact P-values are indicated in the respective figure panels. Data were analyzed using one-way ANOVA (D–E).


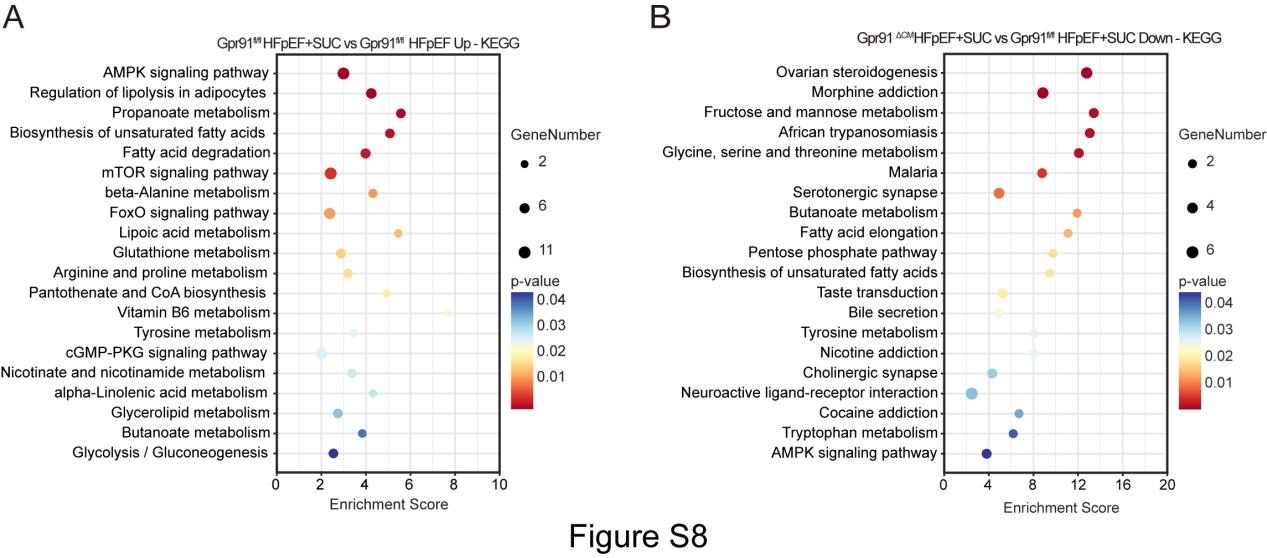


**Supplemental Figure 8: KEGG pathway enrichment analysis of differentially expressed genes in myocardial tissue.**

(A), KEGG pathway enrichment analysis based on upregulated pathways in Gpr91fl/fl HFpEF+SUC VS Gpr91fl/flHFpEF, using unadjusted differential gene expression analysis.

(B) KEGG pathway enrichment analysis based on downregulated pathways in Gpr91ΔCM HFpEF+SUC VS Gpr91fl/fl HFpEF+SUC, using unadjusted differential gene expression analysis.


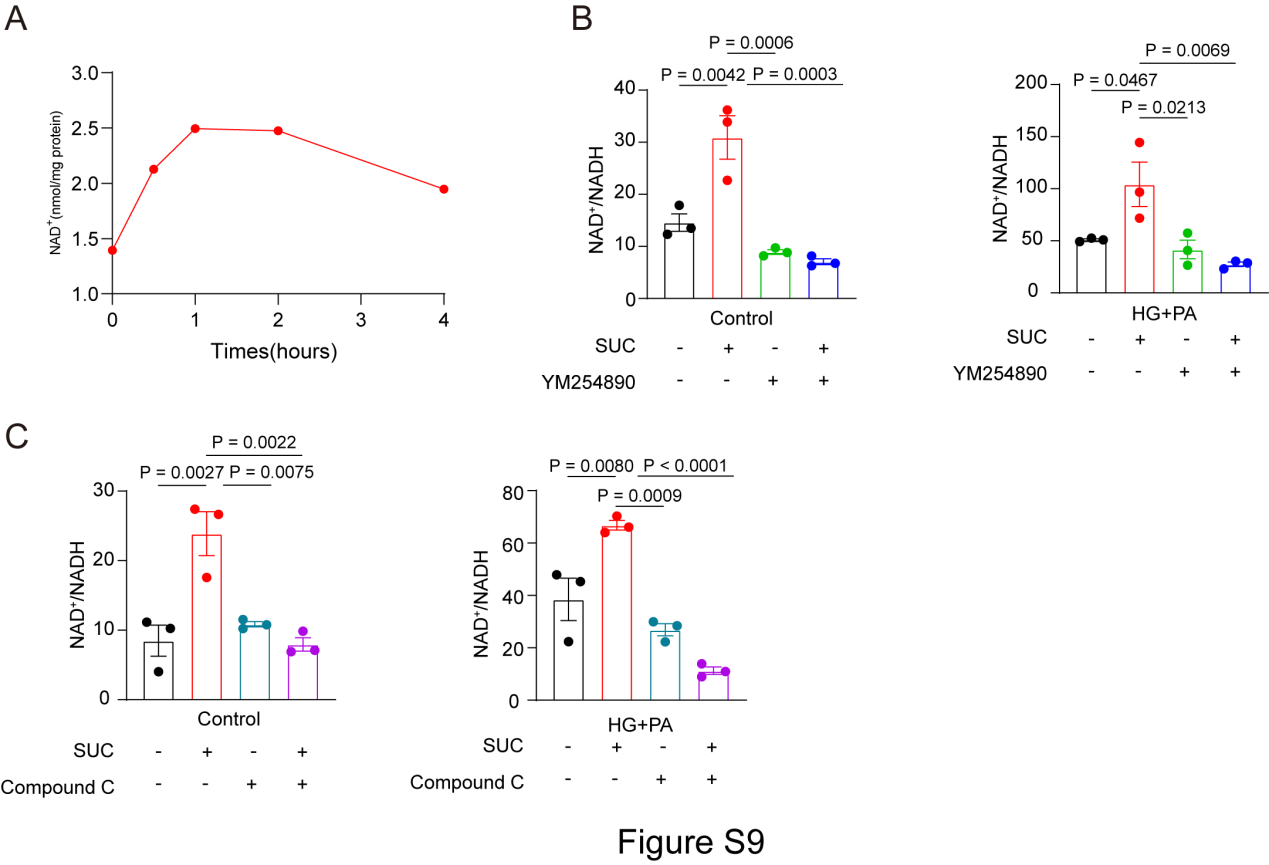


**Supplemental Figure 9: Gqi or Compound C pretreatment abolishes succinate-induced increase in NAD⁺ levels in AC16 cardiomyocytes.**

, Time-course of NAD⁺ levels following succinate stimulation(400uM) at the indicated time points in AC16 cells. **(B)**, Intracellular NAD+/NADH levels in AC16 cells treated with succinate and/or Gqi(1uM) in normal and HG+PA environments. **(C)**, NAD+/NADH levels following treatment with succinate and/or AMPK inhibitor (Compound C 10uM) in normal and HG+PA environments. Data are expressed as mean ± SEM. P < 0.05 was considered statistically significant, and exact P-values are indicated in the respective figure panels. Data were analyzed using two-way ANOVA (B and C).


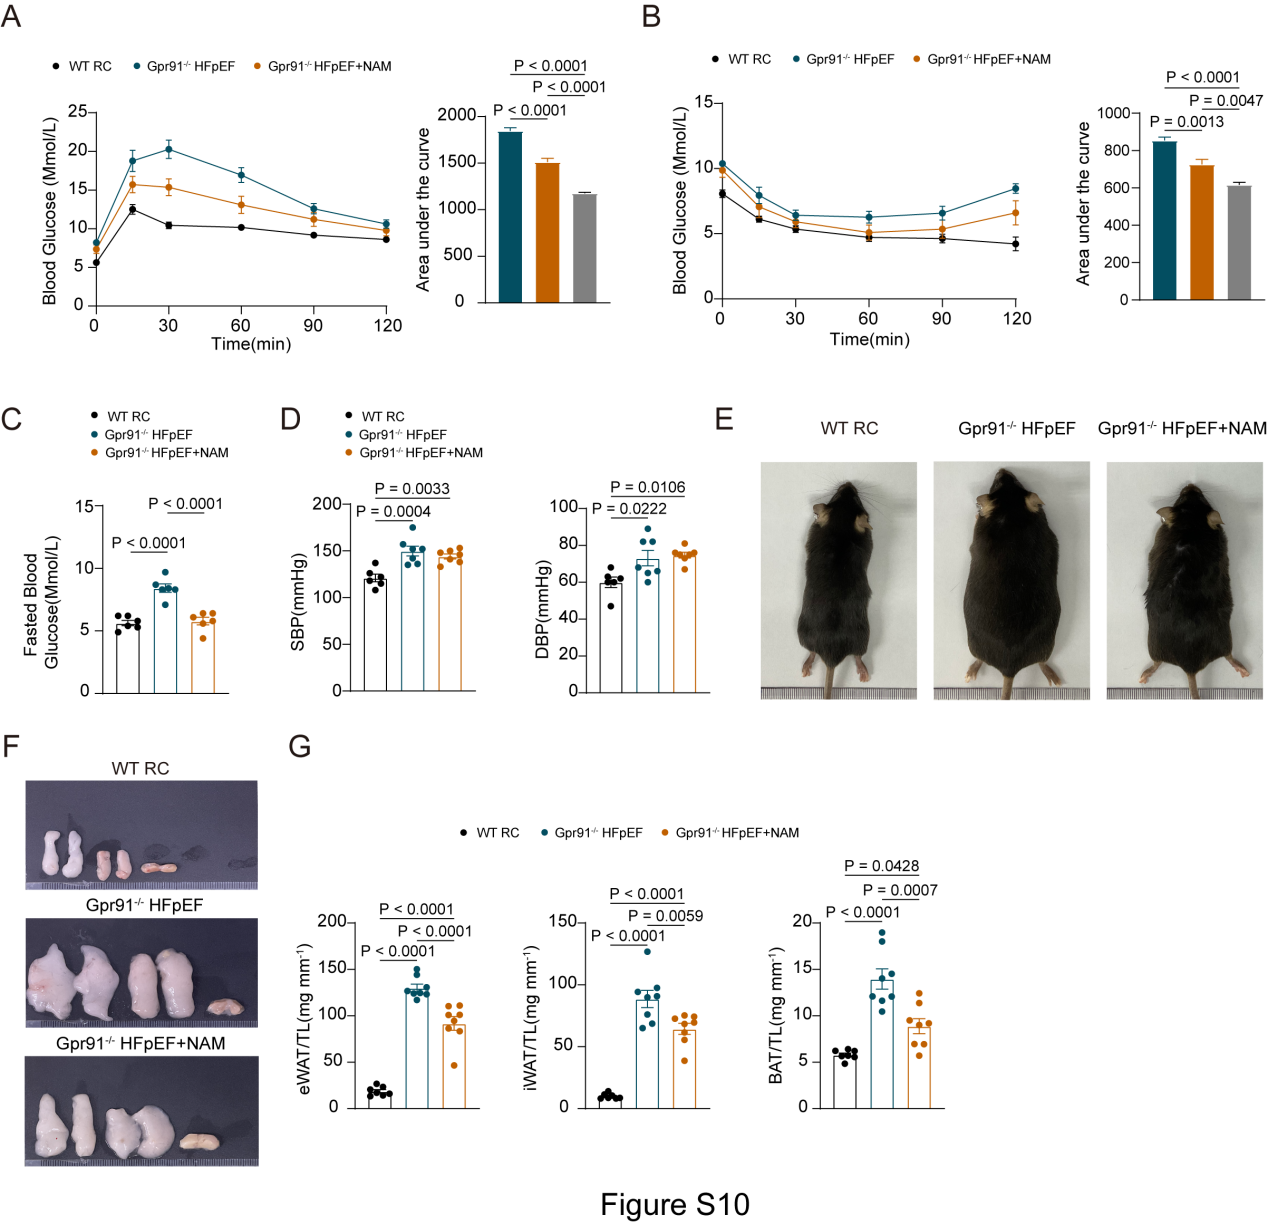


**Supplemental Figure 10: Nicotinamide (NAM) treatment ameliorates glucose metabolism disorder and reduces adiposity in Gpr91-/- HFpEF mice.**

**(A),** Glucose tolerance test and **(B)**, insulin tolerance test, as well as the area under curve (AUC). n=6 in each group. **(C)**, Fasted blood glucose levels. n=6 in each group. **(D),** Systolic and diastolic blood pressure measurements.n=6-7 in each group. **(E)**, Representative gross morphology of mice. **(F and G)**, Representative images and quantification of adipose tissue. Epididymal white adipose tissue (eWAT), inguinal white adipose tissue (iWAT), brown adipose tissue(BAT). n=7-8 in each group. All data are presented as the mean±SEM. P<0.05 are statistically significant and precise values are specified in corresponding figures. Data were analyzed by one-way ANOVA(C-G) and two-way ANOVA (A-B).

**Table S1**

**Echocardiographic Parameters**

| **Parameter** | **WT RC** | **WT RC+SUC** | **WT HFpEF** | **WT HFpEF+SUC** |
| --- | --- | --- | --- | --- |
| HR (bpm) | 554.2±36.04 | 512.7±29.03 | 527.4±8.665 | 527.1±10.69 |
| MV E/A ratio | 1.39±0.06 | 1.418±0.10 | 2.017±0.07 | 1.342±0.05 |
| MV E/e’ ratio | 32.77±1.83 | 33.47±1.94 | 44.89±1.31 | 34.44±1.57 |
| LVAWD (mm) | 1.135±0.055 | 1.135±0.077 | 1.206±0.028 | 1.16±0.039 |
| LVAWS (mm) | 1.593±0.056 | 1.703±0.104 | 1.669±0.044 | 1.569±0.044 |
| LVPWD (mm) | 0.827±0.066 | 0.915±0.043 | 1.148±0.028 | 1.031±0.042 |
| LVPWS (mm) | 1.318±0.097 | 1.368±0.072 | 1.627±0.047 | 1.441±0.049 |
| LVIDD (mm) | 3.515±0.092 | 3.593±0.021 | 3.905±0.068 | 3.244±0.076 |
| LVIDS (mm) | 2.445±0.062 | 2.328±0.109 | 2.630±0.082 | 2.191±0.079 |
| EF (%) | 68.43±1.71 | 69.46±2.28 | 66.3±1.74 | 63.98±1.67 |
| FS (%) | 37.77±1.33 | 38.58±1.79 | 36.16±1.31 | 33.92±1.19 |
| LV mass (mg) | 157.00±5.53 | 148.80±12.41 | 192.90±8.16 | 151.90±4.635 |
| LV Vol;d (μl) | 47.85±3.141 | 48.57±2.184 | 64.24±2.758 | 47.84±5.606 |
| LV Vol;s (μl) | 17.66±2.344 | 19.61±2.566 | 25.18±2.106 | 16.92±2.751 |

| **Parameter** | **WT HFpEF** | **WT HFpEF+SUC** | **Gpr91-/- HFpEF** | **Gpr91-/- HFpEF+SUC** |
| --- | --- | --- | --- | --- |
| HR (bpm) | 554.0±10.06 | 540.9±12.59 | 568.1±11.05 | 557.9±8.807 |
| MV E/A ratio | 1.916±0.042 | 1.350±0.051 | 2.329±0.151 | 2.205±0.073 |
| MV E/e’ ratio | 45.16±0.627 | 35.84±2.077 | 51.81±1.427 | 47.58±1.403 |
| LVAWD (mm) | 1.236±0.036 | 1.107±0.039 | 1.253±0.028 | 1.237±0.022 |
| LVAWS (mm) | 1.768±0.040 | 1.688±0.070 | 1.746±0.025 | 1.709±0.022 |
| LVPWD (mm) | 1.098±0.042 | 0.938±0.030 | 1.066±0.032 | 1.095±0.027 |
| LVPWS (mm) | 1.559±0.024 | 1.395±0.021 | 1.568±0.024 | 1.514±0.027 |
| LVIDD (mm) | 3.793±0.063 | 3.688±0.031 | 3.706±0.091 | 3.646±0.038 |
| LVIDS (mm) | 2.269±0.072 | 2.372±0.060 | 2.364±0.104 | 2.341±0.041 |
| EF (%) | 68.82±1.93 | 65.38±1.873 | 68.27±1.98 | 67.16±1.25 |
| FS (%) | 38.03±1.61 | 35.38±1.41 | 38.49±1.31 | 36.57±0.94 |
| LV mass (mg) | 176.3±6.933 | 166.5±7.004 | 176.4±4.998 | 177.3±5.707 |
| LV Vol;d (μl) | 53.54±2.570 | 52.18±2.835 | 58.38±4.484 | 57.09±1.195 |
| LV Vol;s (μl) | 19.23±1.367 | 17.59±0.883 | 18.87±1.175 | 19.51±0.779 |

| **Parameter** | **Gpr91fl/fl HFpEF** | **Gpr91fl/fl HFpEF+SUC** | **Gpr91ΔCM HFpEF** | **Gpr91ΔCM HFpEF+SUC** |
| --- | --- | --- | --- | --- |
| HR (bpm) | 593.6±8.856 | 524.5±17.47 | 577.2±13.84 | 532.8±14.21 |
| MV E/A ratio | 1.863±0.072 | 1.330±0.041 | 2.399±0.182 | 2.187±0.136 |
| MV E/e’ ratio | 45.16±0.627 | 35.84±2.077 | 51.81±1.427 | 47.58±1.403 |
| LVAWD (mm) | 1.168±0.038 | 1.070±0.073 | 1.164±0.028 | 1.128±0.062 |
| LVAWS (mm) | 1.675±0.051 | 1.550±0.059 | 1.762±0.037 | 1.556±0.040 |
| LVPWD (mm) | 1.030±0.039 | 1.023±0.030 | 1.056±0.030 | 1.100±0.038 |
| LVPWS (mm) | 1.521±0.041 | 1.330±0.048 | 1.461±0.034 | 1.511±0.068 |
| LVIDD (mm) | 3.490±0.087 | 3.333±0.158 | 3.828±0.083 | 3.473±0.085 |
| LVIDS (mm) | 2.108±0.063 | 2.163±0.242 | 2.546±0.083 | 2.438±0.136 |
| EF (%) | 71.34±1.796 | 69.90±1.408 | 65.32±1.704 | 68.64±1.503 |
| FS (%) | 39.84±1.06 | 38.14±1.13 | 35.36±1.31 | 35.69±1.18 |
| LV mass (mg) | 145.8±7.201 | 133.5±10.54 | 168.2±5.327 | 154.4±5.250 |
| LV Vol;d (μl) | 53.13±1.725 | 43.74±3.487 | 61.70±3.793 | 54.00±1.561 |
| LV Vol;s (μl) | 14.78±0.878 | 13.73±1.644 | 23.24±1.047 | 19.04±2.113 |

| **Parameter** | **WT RC** | **Gpr91-/- HFpEF** | **Gpr91-/- HFpEF+NAM** |
| --- | --- | --- | --- |
| HR (bpm) | 574.3±12.38 | 563.9±13.08 | 579.8±10.10 |
| MV E/A ratio | 1.342±0.058 | 2.216±0.097 | 1.427±0.045 |
| MV E/e’ ratio | 25.25±1.637 | 48.61±2.046 | 34.59±1.330 |
| LVAWD (mm) | 1.1045±0.036 | 1.237±0.026 | 1.116±0.035 |
| LVAWS (mm) | 1.752±0.054 | 1.856±0.052 | 1.700±0.040 |
| LVPWD (mm) | 0.948±0.025 | 1.111±0.029 | 1.033±0.030 |
| LVPWS (mm) | 1.57±0.045 | 1.524±0.054 | 1.478±0.039 |
| LVIDD (mm) | 3.560±0.101 | 3.792±0.102 | 3.699±0.091 |
| LVIDS (mm) | 1.873±0.091 | 2.338±0.146 | 2.235±0.081 |
| EF (%) | 79.60±1.600 | 71.73±3.140 | 72.14±2.153 |
| FS (%) | 47.48±1.64 | 40.94±2.87 | 40.70±1.94 |
| LV mass (mg) | 133.0±5.880 | 180.6±8.340 | 168.1±4.938 |
| LV Vol;d (μl) | 53.32±3.620 | 61.24±4.269 | 58.54±3.501 |
| LV Vol;s (μl) | 11.00±1.331 | 19.65±3.222 | 17.21±1.436 |

| **Parameter** | **Gpr91fl/fl RC** | **Gpr91ΔCM RC** |
| --- | --- | --- |
| HR (bpm) | 571.7±20.89 | 563.7±8.644 |
| MV E/A ratio | 1.602±0.025 | 1.644±0.050 |
| MV E/e’ ratio | 28.53±2.482 | 27.21±2.625 |
| LVAWD (mm) | 0.977±0.035 | 0.928±0.043 |
| LVAWS (mm) | 1.542±0.082 | 1.400±0.040 |
| LVPWD (mm) | 0.891±0.048 | 0.774±0.013 |
| LVPWS (mm) | 1.353±0.080 | 1.312±0.050 |
| LVIDD (mm) | 3.690±0.0109 | 3.752±0.109 |
| LVIDS (mm) | 2.293±0.203 | 2.398±0.132 |
| EF (%) | 71.77±3.059 | 67.67±1.540 |
| FS (%) | 40.42±2.424 | 37.19±1.098 |
| LV mass (mg) | 119.1±6.844 | 98.73±3.990 |
| LV Vol;d (μl) | 58.15±4.070 | 60.43±4.161 |
| LV Vol;s (μl) | 19.29±3.974 | 20.52±2.798 |

RC, Regular Chow; HFpEF, Heart Failure With Preserved Ejection Fraction; HR, heart rate; LVAWD, Left Ventricular Anterior Wall at end-Diastole; LVAWS, Left Ventricular Anterior Wall at end-Systole; LVPWD, Left Ventricular Posterior Wall at end-Diastole; LVPWS, Left Ventricular Posterior Wall at end-Systole; LVIDD, Left Ventricular Internal Dimension at end-Diastole; LVIDS, Left Ventricular Internal Dimension at end-Systole; EF, Ejection Fraction; FS, Fractional Shortening; LV mass, Left Ventricle Mass Index; LV Vol;d, Left Ventricle Volume at diastole; LV Vol;s, Left Ventricle Volume at systole.

**Table S2**

**Primers used for qPCR**

| Species | Gene | Sequence-F (5’-3’) | Sequence-R (5’-3’) |
| --- | --- | --- | --- |
| Mouse | Anf | CCTCATCTTCTACCGGCATC | CACAGATCTGATGGATTTCAAGA |
| Mouse | Bnp | CCAGCAGCTGCATCTTGAAT | GAAGGTGCTGTCCCAGATGA |
| Mouse | Myh7 | TTTCTCGGAGCCACCTTGGAAC | ACCCTCAGGTAGGAGTGGGAG |
| Mouse | Collagen I | GACGGCTGAGTAGGGAACACA | GAGTACTGGATCGACCCTAACCA |
| Mouse | Collagen III | TGAGTCGAATTGGGGAGAAT | TCCCCTGGAATCTGTGAATC |
| Mouse | α-Sma | GGCCACACGAAGCTCGTTAT | TCCTGACGCTGAAGTATCCGATA |
| Mouse | Adra1a | CCGCGCAGCAGCTGAAT | AGTGACTCTCAACTTGGCCG |
| Mouse | Igf1r | ACAACTACTGCTCCAAAGACAA | GGCCCTTTATCACCACCACA |
| Mouse | Fbp2 | GCACAATGACGGACAGAAGC | CCCCGAAATCCCATACAGGT |
| Mouse | Irs1 | ACTGGACATCACAGCAGAATGAA | AGACGTGAGGTCCTGGTTGT |
| Mouse | Pfkfb1 | AGAGGCAGTGAGCTACAGGAAC | TGACCTTCCTCACGGCTGAGAT |
| Mouse | Acacb | TTACAGTCACAGCGGAGAGC | AGACCATTCAGGCAACTGTGT |
| Mouse | Acsl6 | GTGGTACAACAGGGAACCCC | CTCCGTGGCAGTAGACAACA |
| Mouse | Acot6 | GCCAGTTCCCTGGGATCATC | AGGCGAACGTCACTCAGATTT |
| Mouse | Acsl1 | TTACACACGGGGGACATTGG | TGCTATGAGAAAGGCCTGCAA |
| Mouse | Abcd2 | GAACTACCCCTCAGCGACAC | TGCATCCCTTCTTCCACTTTGA |
| Mouse | Acot1 | AGTGCTGATTCAAGGGCTGG | TTCTCGCAGCTGGATTGAAC |
| Mouse | Acot2 | AAGAAGCCGTGAACTACCTGCG | TGTGATGCCCTTCAGGAAGGAG |
| Mouse | Acot3 | ACTACGAGGACCTCCCTAAGGA | CATGGCAAAGCCAAGTTCACCC |
| Mouse | Aldob | CCCCTTTGCTGTACCTGTCA | ACTGCCTTCGGTTCTCTTCG |
| Mouse | Slc2a9 | TTGCTTTAGCTTCCCTGATGTG | GAGAGGTTGTACCCGTAGAGG |
| Mouse | Slc5a1 | TGTGGGCCATGTTTTCCACT | CACCAAAACCAAGGCGTTCC |
| Mouse | Slc27a1 | CGCTTTCTGCGTATCGTCTG | GATGCACGGGATCGTGTCT |
| Mouse | Cd36 | GGACATTGAGATTCTTTTCCTCTG | GCAAAGGCATTGGCTGGAAGAAC |
| Mouse | Cpt2 | GATGGCTGAGTGCTCCAAATACC | GCTGCCAGATACCGTAGAGCAA |
| Mouse | Slc5a1 | TTGAAGCGCTGCCAGTATGT | ACAGGAAAGTGACCCCAGTG |
| Mouse | 18s | GTAACCCGTTGAACCCCATT | CCATCCAATCGGTAGTAGCG |
| Human | ACACB | GACGAGCTGATCTCCATCCTCA | ATGGACTCCACCTGGTTATGCC |
| Human | ADRA1A | TCTCCAAGACGGATGGCGTTTG | TGGTGACAGAGCGAGACTTCGT |
| Human | IGF1R | CCTGCACAACTCCATCTTCGTG | CGGTGATGTTGTAGGTGTCTGC |
| Human | FBP2 | CTCCATCGGAACCATCTTTGCC | GTTGCACTACCGTACAGCGCAT |
| Human | IRS1 | AGTCTGTCGTCCAGTAGCACCA | ACTGGAGCCATACTCATCCGAG |
| Human | PFKFB1 | GGCGAGAGTGAACTCAACATCAG | TGTGACTGGTCCACACCTTCAG |

**Table S3**

**Antibodys used for Western Blot**

| Target antigen | Host | Company | Catlog |
| --- | --- | --- | --- |
| GAPDH | Rabbit | Proteintech | 10494-1-AP |
| AMPKα | Rabbit | Cell Signaling Technology | 5831S |
| p-AMPKα | Rabbit | Cell Signaling Technology | 2535S |
| GPR91 | Rabbit | Bioss | bs-15392R |
